# Supplementary material for: Dissecting the Chromosome-Level Genome of The Asian Clam (Corbicula Fluminea)
Source: Research Square preprint supplement (doi:10.21203/rs.3.rs-451586/v1), 2021-04-29
Supplement: Supplementary file 4 [file 230ad19b41c9175e65dd6f4e.docx]

**Table S1:** Statistics of the sequencing data

| Types | Sequencing  platform | Library size | Number of library | Clean data  (Gb) | Coverage  (×) † |
| --- | --- | --- | --- | --- | --- |
| Illumina | Illumina HiSeq X | 350 bp | 6 | 252.77 | 154.13 |
| PacBio | PacBio Sequel II | 20 kb | 2 | 293.72 | 193.40 |
| Hi-C | Illumina HiSeq X | 300–700 bp | 2 | 233.26 |  |
| Transcriptome | Illumina HiSeq X | 350 bp | 1 | 8.18 | - |

**Table S2:** Statistics of the different types of Hi-C reads

| Mapping type | | Ratio to total read pairs (%) | Ratio to unique mapped read pairs (%) |
| --- | --- | --- | --- |
| Total read pairs | | 780,870,254 (100) | - |
| Mapped read pairs | | 571,597,025 (73.20) | - |
| Unique mapped read pairs | | 188,834,895 (24.18) | 188,834,895 (100) |
| Valid interaction pairs | | 116,652,252 (14.94) | 116,652,252 (61.77) |
| Invalid interaction pairs | Dangling end pairs | 72,182,643 (9.24) | 32,181,456 (17.04) |
| Re-ligation pairs | 13,552,964 (7.18) |
| Self-cycle pairs | 1,289,195 (0.68) |
| Dumped pairs | 25,159,028 (13.32) |

**Table S3:** Summary of the Hi-C assembly

| Group | Cluster number | Cluster length (bp) | Order number | Order length (bp) |
| --- | --- | --- | --- | --- |
| Chr01 | 470 | 153,803,806 | 371 | 144,229,830 |
| Chr02 | 313 | 107,196,770 | 231 | 96,729,369 |
| Chr03 | 326 | 105,879,025 | 262 | 99,673,625 |
| Chr04 | 353 | 89,177,396 | 255 | 79,719,718 |
| Chr05 | 190 | 87,093,095 | 156 | 83,870,643 |
| Chr06 | 249 | 85,721,425 | 191 | 79,888,130 |
| Chr07 | 272 | 82,224,449 | 201 | 75,738,333 |
| Chr08 | 339 | 80,407,287 | 252 | 71,696,766 |
| Chr09 | 236 | 76,323,934 | 172 | 70,155,845 |
| Chr10 | 206 | 75,434,972 | 158 | 70,608,841 |
| Chr11 | 203 | 73,470,129 | 156 | 68,962,617 |
| Chr12 | 227 | 73,804,105 | 181 | 68,909,514 |
| Chr13 | 208 | 72,126,331 | 155 | 67,123,217 |
| Chr14 | 225 | 72,953,836 | 170 | 67,734,440 |
| Chr15 | 218 | 69,882,476 | 166 | 64,959,859 |
| Chr16 | 177 | 68,966,225 | 136 | 65,096,897 |
| Chr17 | 200 | 69,709,078 | 148 | 64,804,978 |
| Chr18 | 209 | 61,886,338 | 170 | 57,909,238 |
| Total (Ratio %) | 4,621 (97.74) | 1,506,060,677 (99.17) | 3,531 (76.41) | 1,397,811,860 (92.81) |

**Table S4:** Summary of the assessment of genome assembly

| Parameter | BUSCO groups (%) | CEGMA groups (%) | Illumina reads ratio (%) |
| --- | --- | --- | --- |
| Total BUSCOs | 978 (100) | - | - |
| Complete BUSCOs | 889 (90.90) | - | - |
| Complete and single-copy BUSCOs | 721 (73.72) | - | - |
| Complete and duplicated BUSCOs | 168 (17.18) | - | - |
| Fragmented BUSCOs | 26 (2.66) | - | - |
| Missing BUSCOs | 63 (6.44) | - | - |
| Total CEGMA | - | 458 (100) | - |
| Searched CEGMA | - | 423 (92.36) | - |
| Number of 248 highly conserved | - | 205 (82.66) | - |
| Total reads | - | - | 1,664,680,996 (100) |
| Mapped reads | - | - | 1,622,200,797 (97.45) |
| Mapped reads pairs | - | - | 1,469,907,318 (88.30) |

**Table S5:** Statistics of the repeated sequences

| Type | Number | Length（bp） | Percentage (%) |
| --- | --- | --- | --- |
| ClassI/DIRS | 24,688 | 10,566,441 | 1.00 |
| ClassI/LARD | 2,515,771 | 608,849,833 | 57.54 |
| ClassI/LINE | 235,902 | 74,779,768 | 7.07 |
| ClassI/LTR/Copia | 24,935 | 6,273,557 | 0.59 |
| ClassI/LTR/Gypsy | 106,541 | 49,198,634 | 4.65 |
| ClassI/PLE | 445,851 | 130,983,883 | 12.38 |
| ClassI/SINE | 102 | 69,215 | 0.01 |
| ClassI/TRIM | 25,844 | 14,743,872 | 1.39 |
| ClassII/Crypton | 21,742 | 8,053,927 | 0.76 |
| ClassII/Helitron | 179,095 | 54,933,929 | 5.19 |
| ClassII/Maverick | 64,882 | 16,729,014 | 1.58 |
| ClassII/TIR | 444,836 | 110,668,046 | 10.46 |

**Table S6:** Summary of the gene prediction results

| Method | Software | Species | Gene number |
| --- | --- | --- | --- |
| Ab initio | Genscan | - | 30,011 |
| Augustus | - | 37,757 |
| GlimmerHMM | - | 190,287 |
| GeneID | - | 36,389 |
| SNAP | - | 72,674 |
| Homology-based | GeMoMa | *Danio rerio* | 16,546 |
| *Crassostrea gigas* | 29,110 |
| *Crassostrea virginica* | 28,275 |
| *Mizuhopecten yessoensis* | 28,700 |
| Transcriptome-based | PASA | - | 80,463 |
| GeneMarkS-T | - | 53,118 |
| TransDecoder | - | 20,571 |
| Integration | EVM | - | 38,841 |

**Table S7:** Statistics of gene annotation to different databases

| Annotation database | Annotated number | Percentage (%) | 100≤Protein length<300 | Protein length≥300 |
| --- | --- | --- | --- | --- |
| GO_Annotation | 7,489 | 19.28 | 2,243 | 5,119 |
| KEGG_Annotation | 12,757 | 32.84 | 3,466 | 9,144 |
| KOG_Annotation | 18,233 | 46.94 | 4,642 | 13,426 |
| TrEMBL_Annotation | 32,280 | 83.11 | 10,097 | 21,841 |
| Nr_Annotation | 32,382 | 83.37 | 10,170 | 21,858 |
| All_Annotated | 32,591 | 83.91 | 10,275 | 21,957 |

**Table S12:** Summary of gene features in five bivalves

| Species | Multi ortholog | Other ortholog | Single ortholog | Special |
| --- | --- | --- | --- | --- |
| *Bathymodiolus platifrons* | 4,554 | 4,307 | 146 | 23,021 |
| *Corbicula fluminea* | 5,754 | 4,692 | 146 | 25,878 |
| *Crassostrea gigas* | 8,728 | 30,181 | 146 | 18,847 |
| *Crassostrea virginica* | 11,433 | 34,131 | 146 | 13,685 |
| *Ruditapes philippinarum* | 4,545 | 2,446 | 146 | 14,480 |
